# Supplementary material
Source: Springer Nature journal article supplement (https://www.springermedizin.de/resource/supplementary/12888_2007_466_MOESM1_ESM.pdf/9483336)

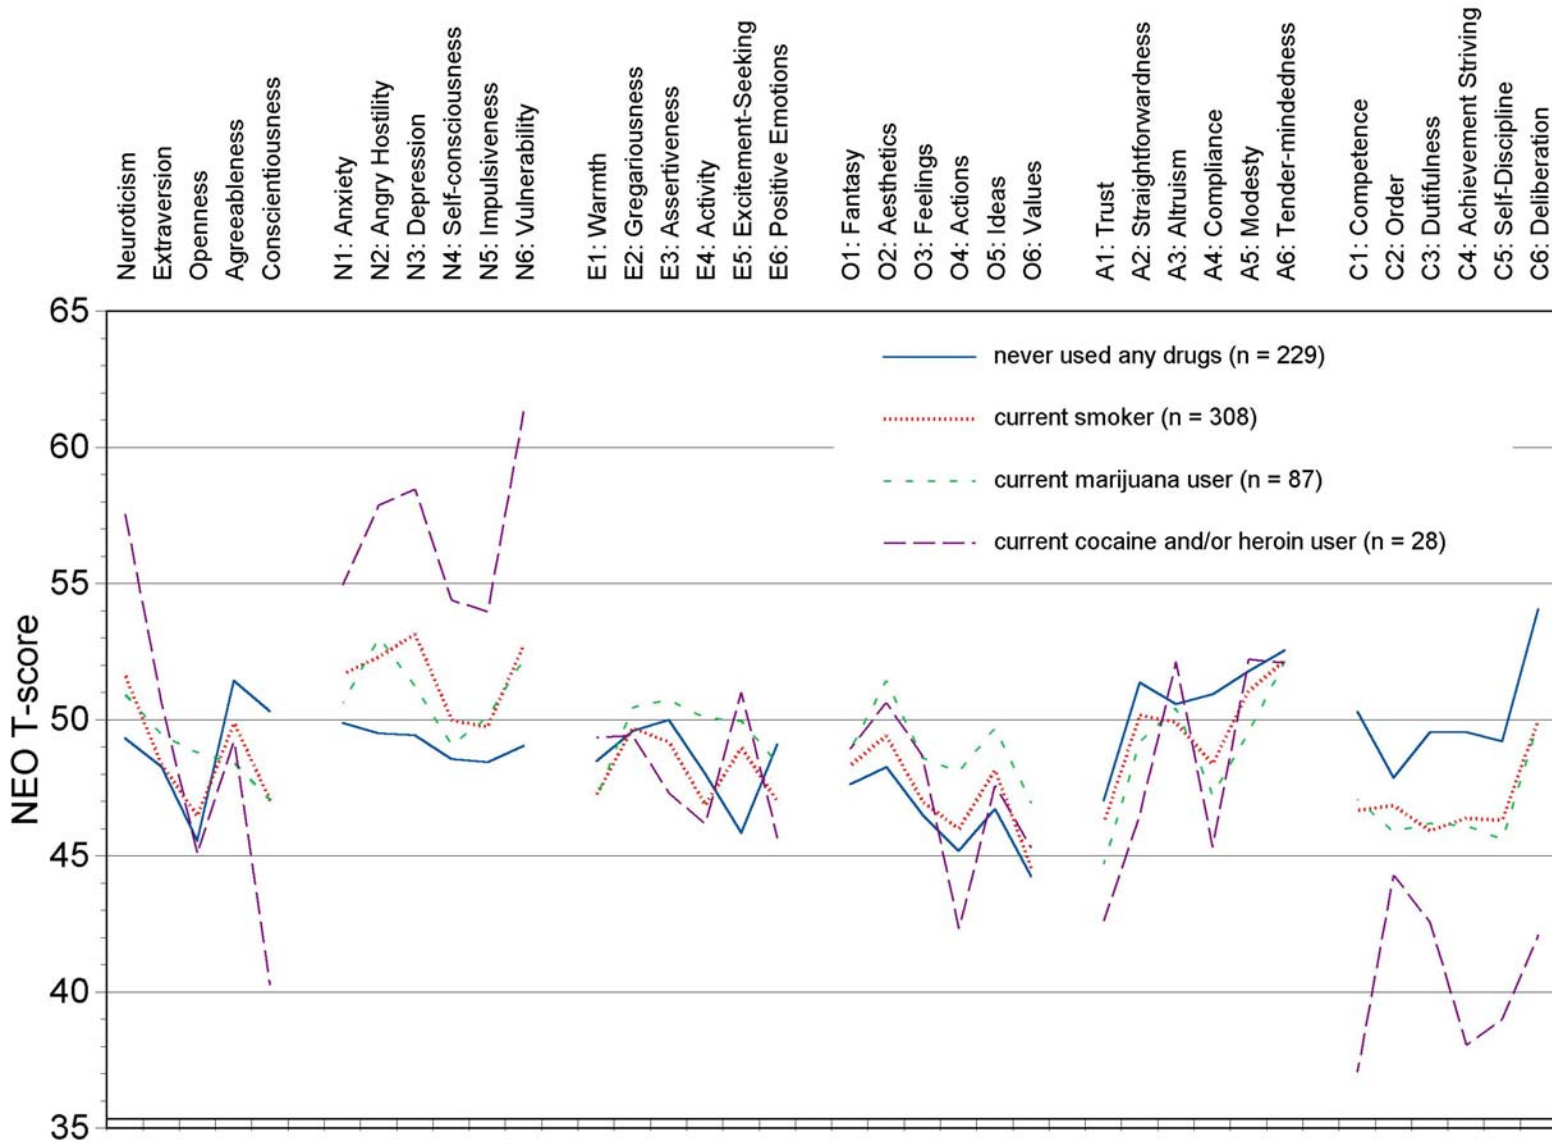

Supplement: MOESM1 [file 9483336]
